# Supplementary material for: Preparation, antibacterial activity, and electrocatalytic detection of hydrazine based on biogenic CuFeO2/PANI nanocomposites synthesized using Aloe barbadensis miller
Source: Royal Society of Chemistry journal article supplement (doi:10.1039/d2nj00913g), 2022-01-01
Supplement: d2nj00913g1.pdf [file d2nj00913g1.pdf]

**Preparation, antibacterial activity, and electrocatalytic detection of hydrazine based on biogenic CuFeO<sub>2</sub>/PANI nanocomposites synthesized using *Aloe barbadensis miller***

Pooja Singh<sup>1</sup>, Kshitij RB Singh<sup>2</sup>, Rahul Verma<sup>2</sup>, Priyanka Prasad<sup>3</sup>, Ranjana Verma<sup>4</sup>, Subha Narayan Das<sup>3</sup>, Jay Singh<sup>2</sup>, Ravindra Pratap Singh<sup>\*1</sup>

<sup>1</sup>Department of Biotechnology, Faculty of Science, Indira Gandhi National Tribal University, Amarkantak, Madhya Pradesh (484887), India

<sup>2</sup>Department of Chemistry, Institute of Science, Banaras Hindu University, Varanasi, Uttar Pradesh (221005), India

<sup>3</sup>Department of Botany, Faculty of Science, Indira Gandhi National Tribal University, Amarkantak, Madhya Pradesh (484887), India

<sup>4</sup>Department of Physics, Institute of Science, Banaras Hindu University, Varanasi, Uttar Pradesh (221005), India

**\*Corresponding Author:**

Dr. Ravindra Pratap Singh,

Assistant Professor,

Department of Biotechnology, Faculty of Science,

Indira Gandhi National Tribal University, Amarkantak,

Madhya Pradesh (484886), India.

Email Id- [rpsnpl69@gmail.com](mailto:rpsnpl69@gmail.com), [ravindra.singh@igntu.ac.in](mailto:ravindra.singh@igntu.ac.in)

Mobile No.- +91-91-0934-6565

## S1. Materials

All the used materials in the work were of analytical grade; they could be used immediately without additional purification. Copper sulphate pentahydrate ( $\text{CuSO}_4 \cdot 5\text{H}_2\text{O}$ ; and MW: 249.68 g/mol), Iron (III) chloride hexahydrate ( $\text{Cl}_3\text{FeH}_{12}\text{O}_6$ ; and MW: 270.33 g/mol), sodium chloride ( $\text{NaCl}$ ; MW: 58.44 g/mol), potassium hexacyanoferrate (III) ( $\text{C}_6\text{FeK}_3\text{N}_6$ ; MW: 329.25 g/mol), Aniline (1L=1.02 kg and MW: 249.68 g/mol), Potassium hexacyanoferrate (II) trihydrate ( $\text{C}_6\text{FeK}_4\text{N}_6 \cdot 3\text{H}_2\text{O}$ ; MW: 422.39 g/mol), hydrazine solution ( $\text{N}_2\text{H}_4$ ; MW: 32.05; CAS number: 302-01-2), and Whatman filter paper (I-Grade) all these materials were purchased from the Sigma Aldrich. Sodium hydroxide ( $\text{NaOH}$ ; MW: 40.00 g/mol) and ammonia liquor ( $\text{NH}_3$ ; MW: 17.03 g/mol) were purchased from the Qualigens, Thermo Fisher Scientific. Luria Bertani Agar, ampicillin (SD002), Miller (GM1151), monosodium phosphate ( $\text{NaH}_2\text{PO}_4$ ; MW: 119.98) and disodium phosphate ( $\text{Na}_2\text{HPO}_4 \cdot \text{H}_2\text{O}$ ; MW: 177.99) were obtained from the Himedia. The indium-tin-oxide (ITO) glass sheets were procured from Sigma-Aldrich with a surface resistivity of 30–60  $\Omega/\text{sq}$  for electrophoretic deposition of biologically synthesized nanocomposites. All of the solutions in this investigation were made with the highly purified Milli-Q water from the Milli-Q water purification system, Surepro Dual filter prefiltration system, USA, with a resistivity of not less than 18 $\Omega$ . Different pure cultures of the gram-negative bacteria (*E. coli*) and gram-positive bacteria (*Microbacterium testaceum*) were obtained in the laboratory. *Aloe barbadensis miller* was obtained from the Dr. Singh's herbal garden at IGNTU, Amarkantak, Madhya Pradesh, India.

## S2. Characterization

UV-vis absorption spectroscopy was employed to investigate the optical characteristics of B-CuFeO<sub>2</sub> NCs and B-CuFeO<sub>2</sub>/PANI NCs in the 200–800 nm wavelength range using Shimadzu, Japan. An FT-IR spectrophotometer was used to determine the vibration spectrum of B-

CuFeO<sub>2</sub> NCs and B-CuFeO<sub>2</sub>/PANI NCs in the 400–4000 cm<sup>-1</sup> spectral region (Nicolet iS5, Thermo Fisher Scientific). The nature of the B-CuFeO<sub>2</sub> NCs and B-CuFeO<sub>2</sub>/PANI NCs were investigated using an X-ray diffractometer (Bruker D8 Advance). Using an EVO 18 system (Zeiss, Germany), the nanomaterial's elemental conformation and surface morphology were determined by the energy dispersive X-ray analysis (EDX) and SEM, respectively. By using a Genetix DC power supply, electrophoretic deposition of desired material was done on the bare ITOs. An electrochemical workstation (Kanopy Techno Solutions Pvt Ltd, India) with a three-electrode setup was used to electrochemically detect hydrazine using the B-CuFeO<sub>2</sub>/PANI NCs modified electrode.

### S3. XRD pattern of B-CuFeO<sub>2</sub>/PANI NCs/ITO electrode

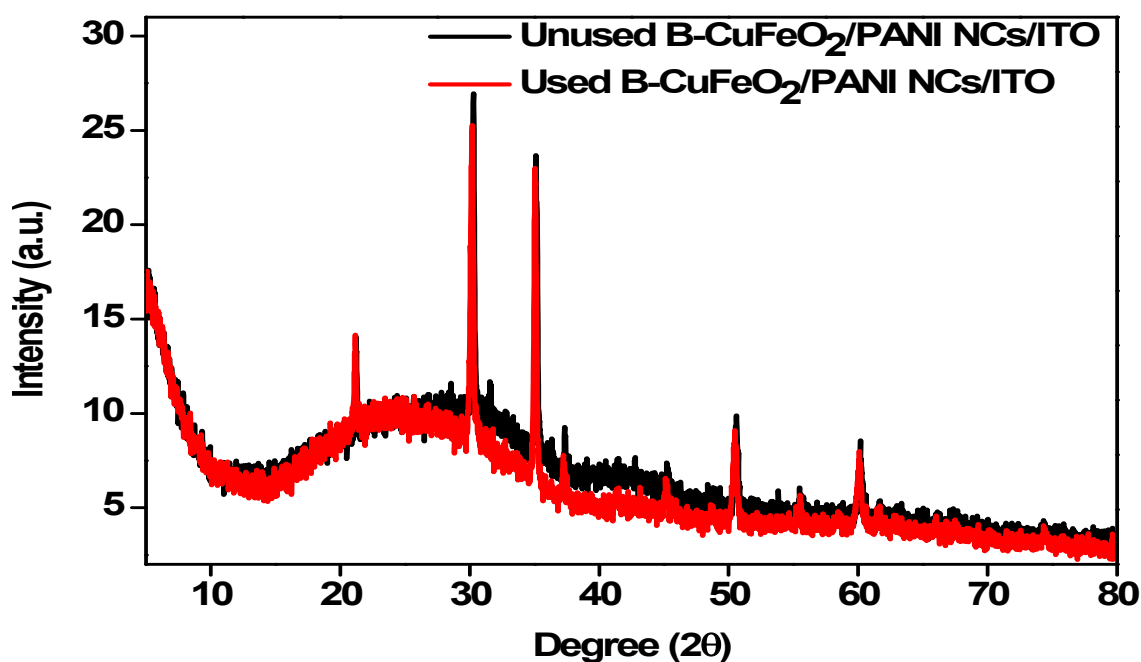

**Fig. S1** XRD pattern of B-CuFeO<sub>2</sub>/PANI NCs/ITO electrode (red and black color represents used and unused electrode, respectively; here used represents the electrode after hydrazine sensing).

## S4. SEM analysis at higher magnification

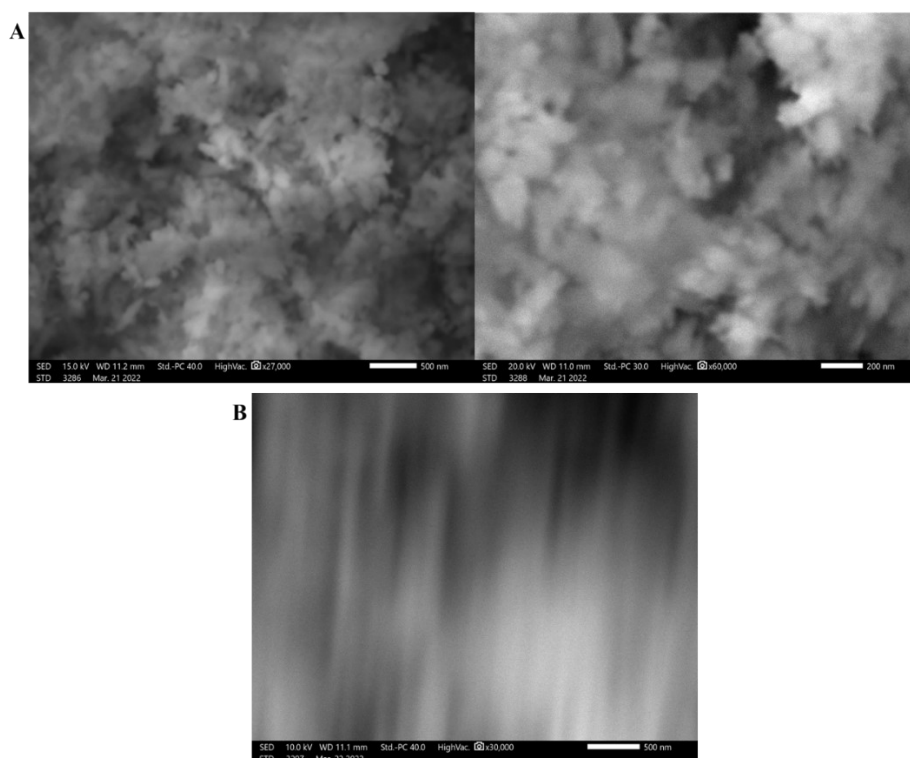

Fig. S2 SEM micrograph at lower magnifications: A) B-CuFeO<sub>2</sub>/PANI NCs and B) B-CuFeO<sub>2</sub>.

## S5. Reproducibility and stability studies of B-CuFeO<sub>2</sub>/PANI NCs/ITO electrode

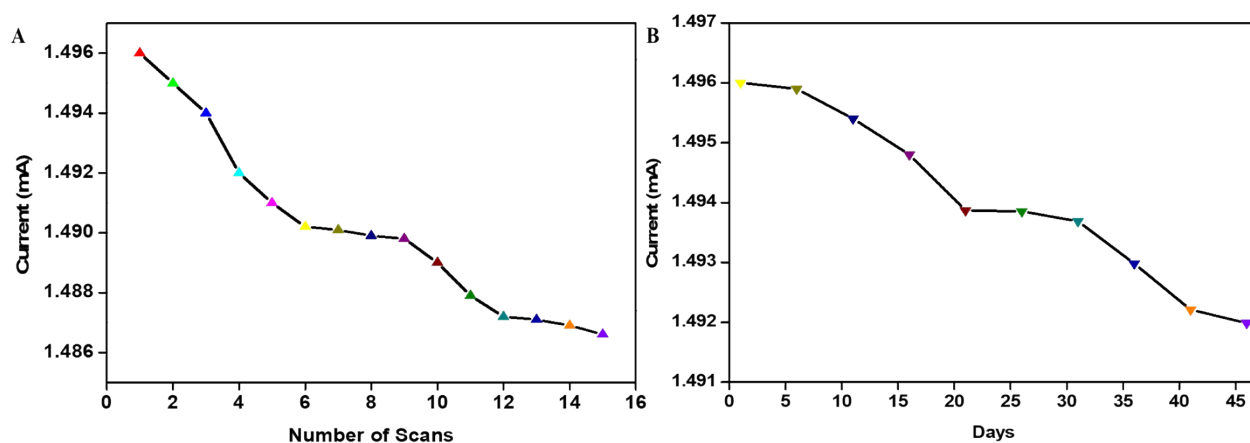

Fig. S3 B-CuFeO<sub>2</sub>/PANI NCs/ITO electrode: A) Reproducibility/reusability study and B) Stability/durability study up to 46 days at interval of 5 days.
